# Supplementary material for: Catalytic performance of PVP-coated CuO nanosheets under environmentally friendly conditions
Source: Royal Society of Chemistry journal article supplement (doi:10.1039/d2ra07645d), 2023-01-01
Supplement: d2ra07645d1.pdf [file d2ra07645d1.pdf]

Supporting Information

**Catalytic Reduction of Aromatic Nitro under Environmentally Friendly  
aqueous media by using PVP-coated CuO Nanosheets**

**Mahdi Shahmiri<sup>a\*</sup>, Saadi Bayat<sup>b</sup>, Sharmin Kharrazi<sup>a</sup>**

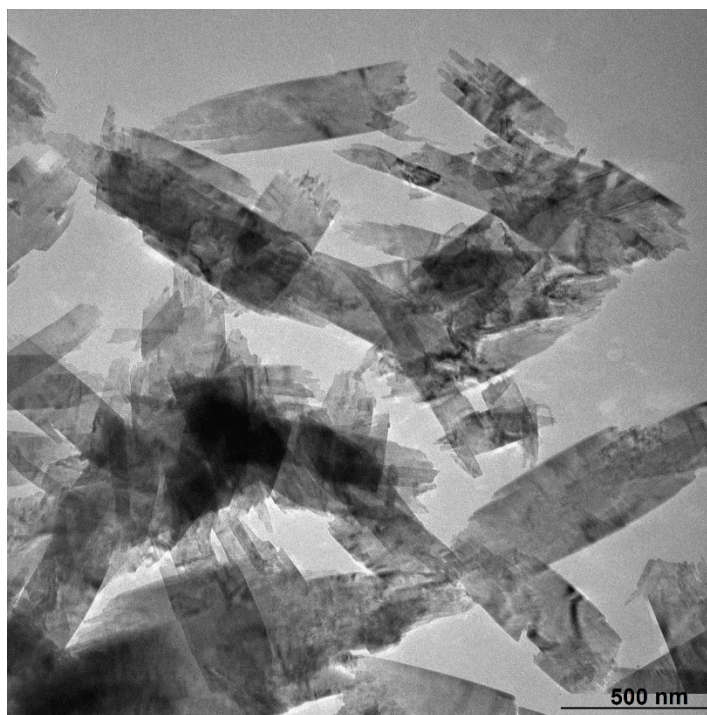

S 1. The TEM image of CuO sheet-like particles obtained at 1.5 wt% of PVP

The yield and progress of reduction reactions were determined by HPLC as shown in Figures S2-S22.

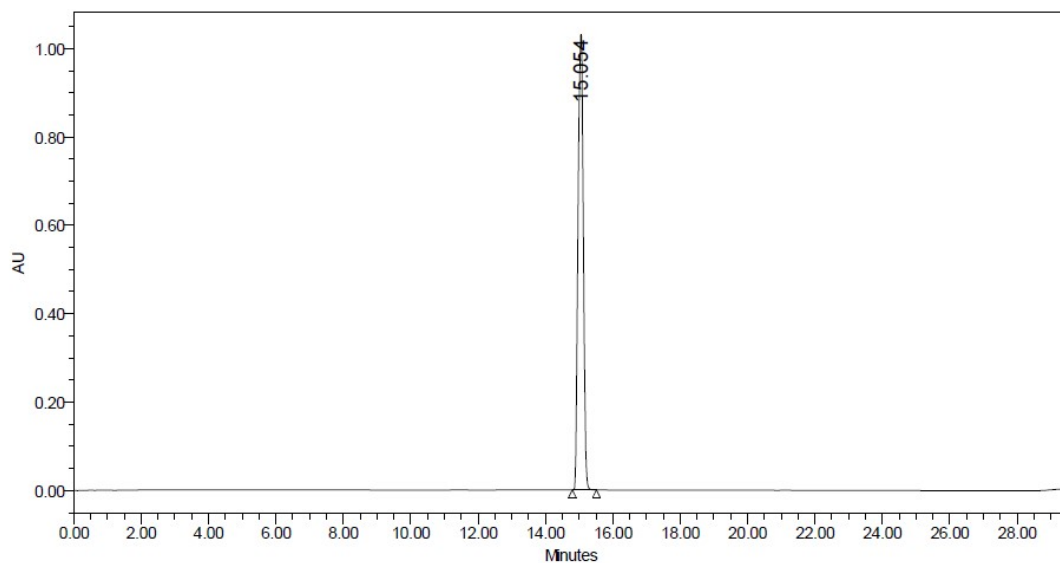

|   | RT (min) | Area ( $\mu\text{V}^*\text{sec}$ ) | % Area | Height ( $\mu\text{V}$ ) | % Height |
|---|----------|------------------------------------|--------|--------------------------|----------|
| 1 | 15.054   | 11221550                           | 100.00 | 1030919                  | 100.00   |

S 2. HPLC of 4-nitrophenol (Standard)

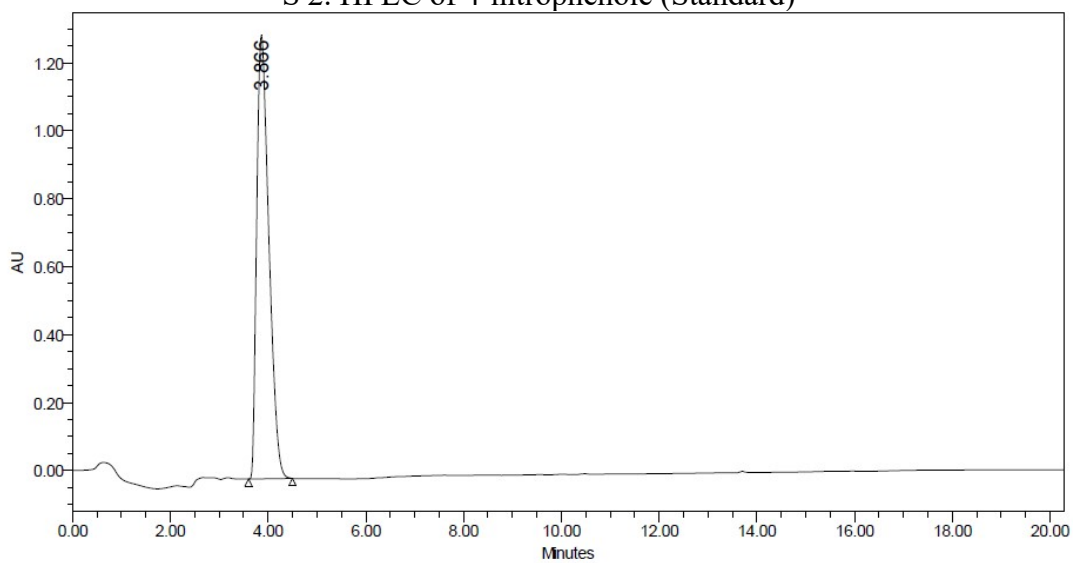

|   | RT (min) | Area ( $\mu\text{V}^*\text{sec}$ ) | % Area | Height ( $\mu\text{V}$ ) | % Height |
|---|----------|------------------------------------|--------|--------------------------|----------|
| 1 | 3.866    | 22629423                           | 100.00 | 1306606                  | 100.00   |

S 3. HPLC of 4-aminophenol (Standard)

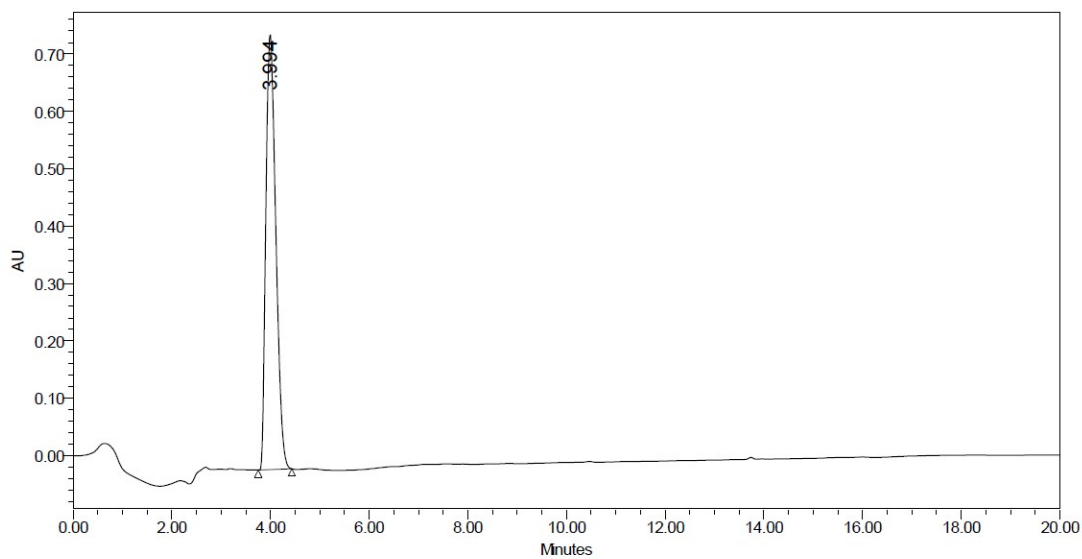

|   | RT (min) | Area ( $\mu\text{V}^*\text{sec}$ ) | % Area | Height ( $\mu\text{V}$ ) | % Height |
|---|----------|------------------------------------|--------|--------------------------|----------|
| 1 | 3.994    | 10566061                           | 100.00 | 758551                   | 100.00   |

S 4. Reusability investigation of CuO-NPs in catalyzing 4-Nitrophenol (Run 2)

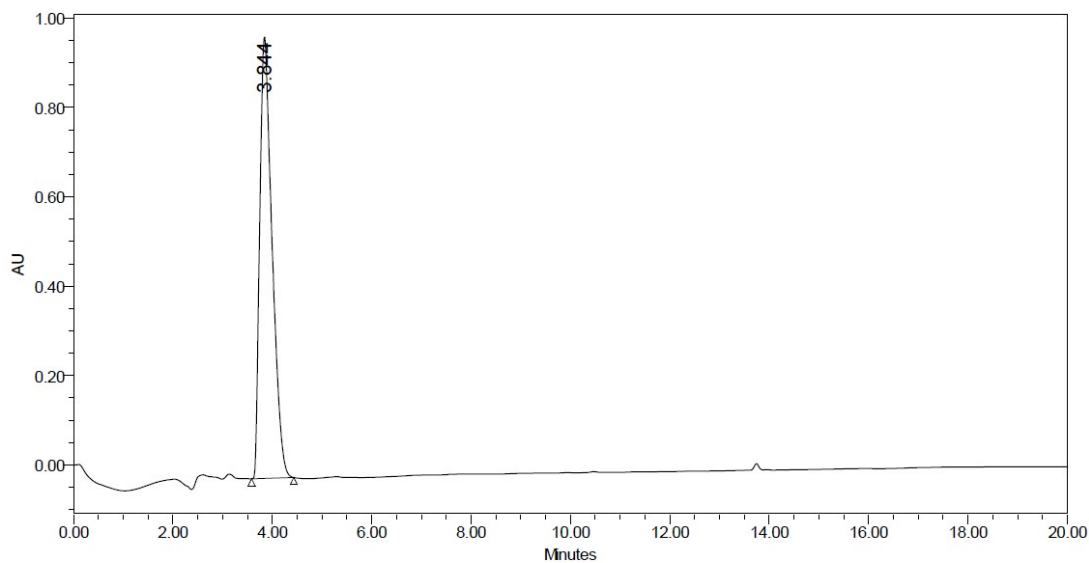

|   | RT (min) | Area ( $\mu\text{V}^*\text{sec}$ ) | % Area | Height ( $\mu\text{V}$ ) | % Height |
|---|----------|------------------------------------|--------|--------------------------|----------|
| 1 | 3.844    | 16936782                           | 100.00 | 988775                   | 100.00   |

S 5. Reusability investigation of CuO-NPs in catalyzing 4-Nitrophenol (Run 3)

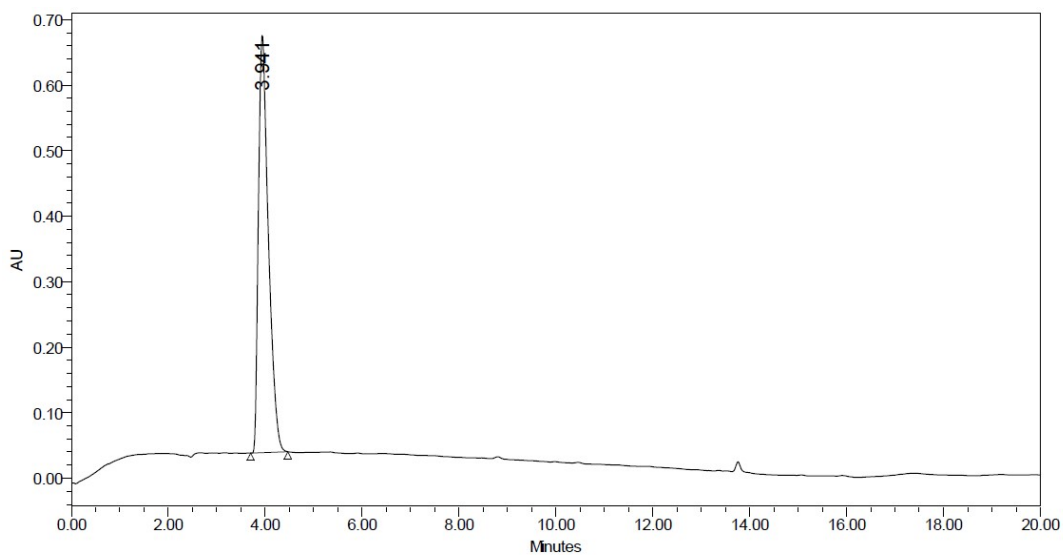

|   | RT (min) | Area ( $\mu\text{V}\cdot\text{sec}$ ) | % Area | Height ( $\mu\text{V}$ ) | % Height |
|---|----------|---------------------------------------|--------|--------------------------|----------|
| 1 | 3.941    | 429648                                | 100.00 | 30068                    | 100.00   |

S 6. Reusability investigation of CuO-NPs in catalyzing 4-Nitrophenol (Run 4)

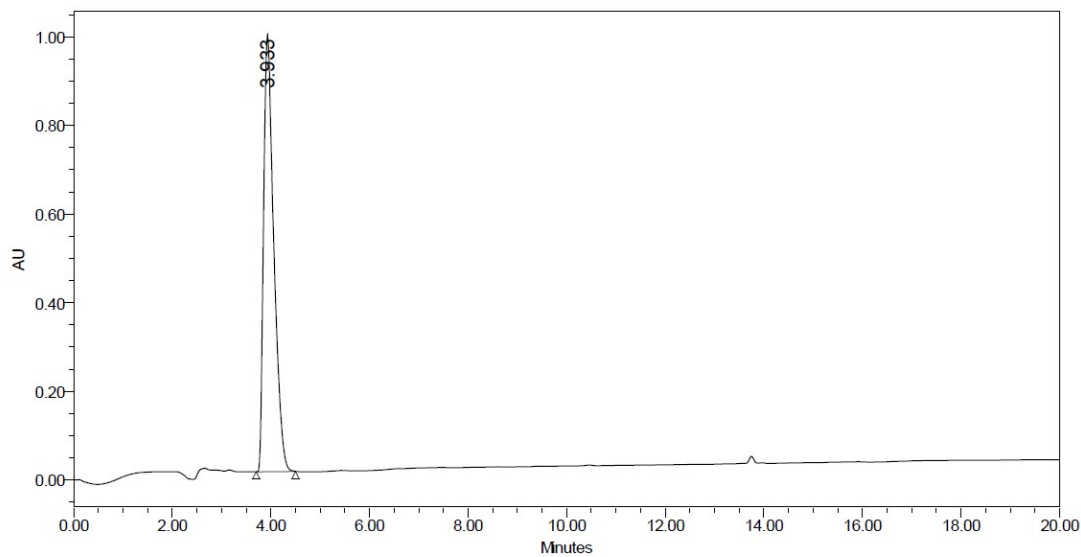

|   | RT (min) | Area ( $\mu\text{V}\cdot\text{sec}$ ) | % Area | Height ( $\mu\text{V}$ ) | % Height |
|---|----------|---------------------------------------|--------|--------------------------|----------|
| 1 | 3.933    | 14100511                              | 100.00 | 987549                   | 100.00   |

S 7. Reusability investigation of CuO-NPs in catalyzing 4-Nitrophenol (Run 5)

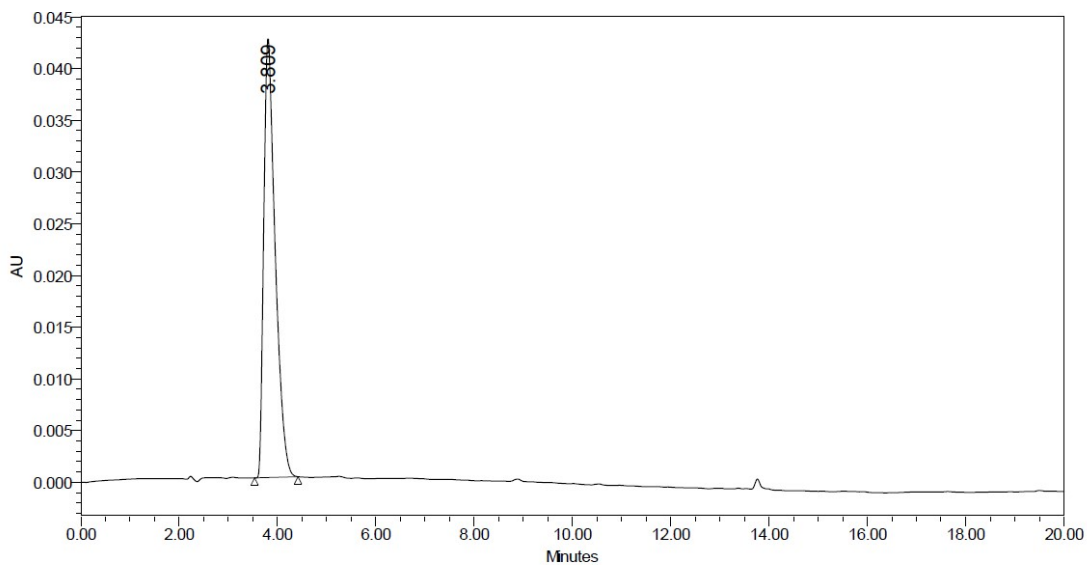

|   | RT (min) | Area ( $\mu\text{V}\cdot\text{sec}$ ) | % Area | Height ( $\mu\text{V}$ ) | % Height |
|---|----------|---------------------------------------|--------|--------------------------|----------|
| 1 | 3.809    | 687410                                | 100.00 | 42589                    | 100.00   |

S 8. Reusability investigation of CuO-NPs in catalyzing 4-Nitrophenol (Run 6)

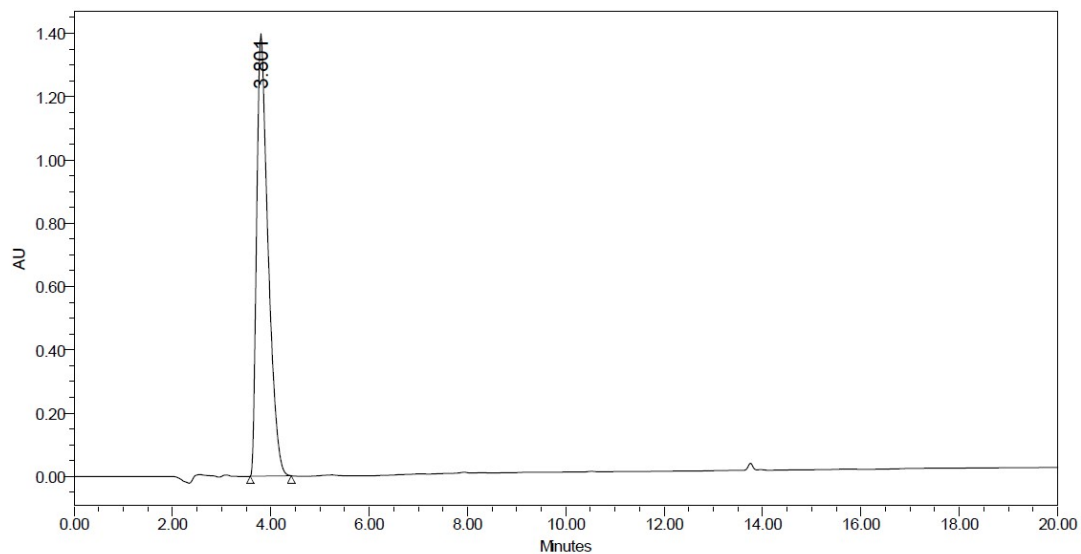

|   | RT (min) | Area ( $\mu\text{V}\cdot\text{sec}$ ) | % Area | Height ( $\mu\text{V}$ ) | % Height |
|---|----------|---------------------------------------|--------|--------------------------|----------|
| 1 | 3.801    | 22536012                              | 100.00 | 1396646                  | 100.00   |

S 9. Reusability investigation of CuO-NPs in catalyzing 4-Nitrophenol (Run 7)

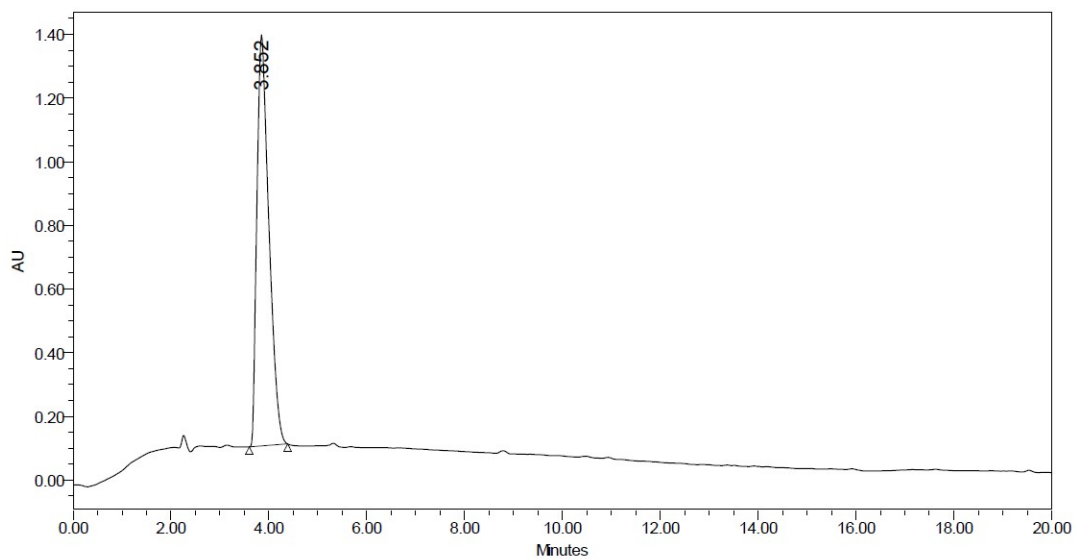

|   | RT (min) | Area ( $\mu\text{V}\cdot\text{sec}$ ) | % Area | Height ( $\mu\text{V}$ ) | % Height |
|---|----------|---------------------------------------|--------|--------------------------|----------|
| 1 | 3.852    | 514204                                | 100.00 | 30096                    | 100.00   |

S 10. Reusability investigation of CuO-NPs in catalyzing 4-Nitrophenol (Run 8)

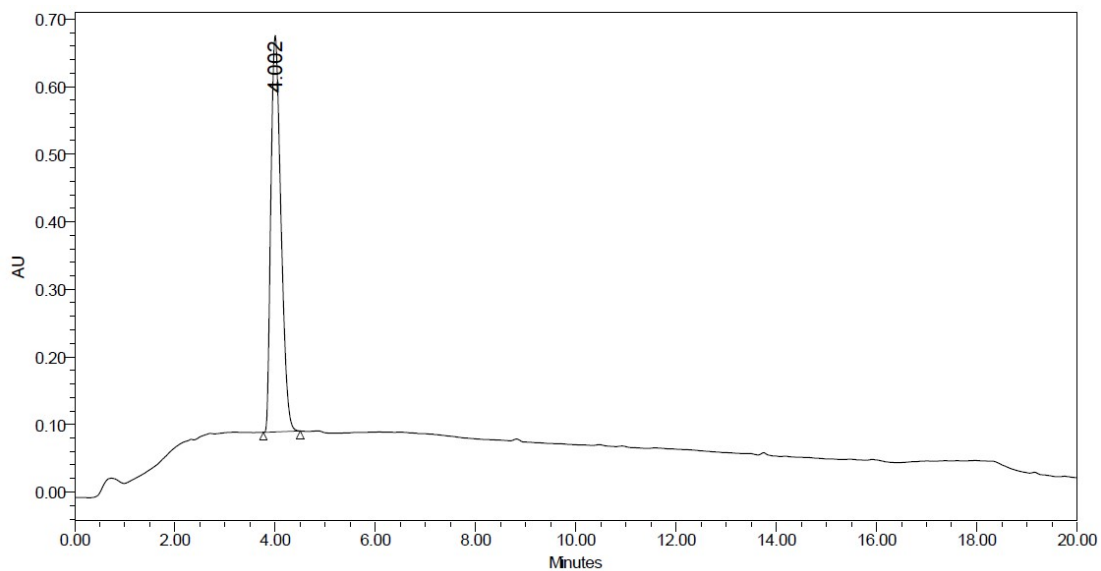

|   | RT (min) | Area ( $\mu\text{V}\cdot\text{sec}$ ) | % Area | Height ( $\mu\text{V}$ ) | % Height |
|---|----------|---------------------------------------|--------|--------------------------|----------|
| 1 | 4.002    | 322975                                | 100.00 | 23106                    | 100.00   |

S 11. Reusability investigation of CuO-NPs in catalyzing 4-Nitrophenol (Run 9)

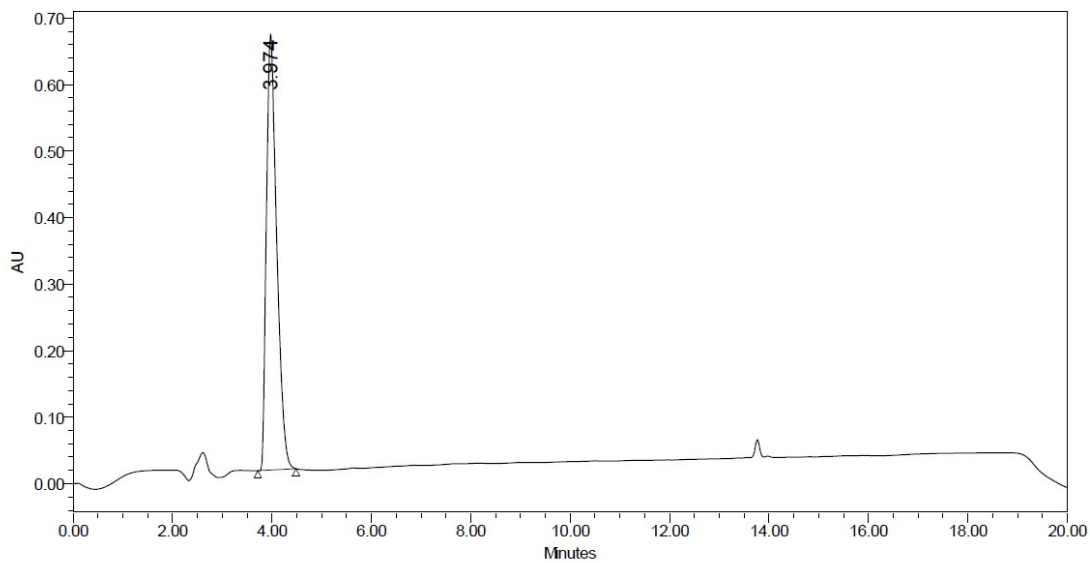

|   | RT<br>(min) | Area<br>( $\mu\text{V}^2\text{sec}$ ) | % Area | Height<br>( $\mu\text{V}$ ) | % Height |
|---|-------------|---------------------------------------|--------|-----------------------------|----------|
| 1 | 3.974       | 9355956                               | 100.00 | 656670                      | 100.00   |

S 12. Reusability investigation of CuO-NPs in catalyzing 4-Nitrophenol (Run 10)

**Reduction of various substrates catalyzed by CuO-Nanosheet**

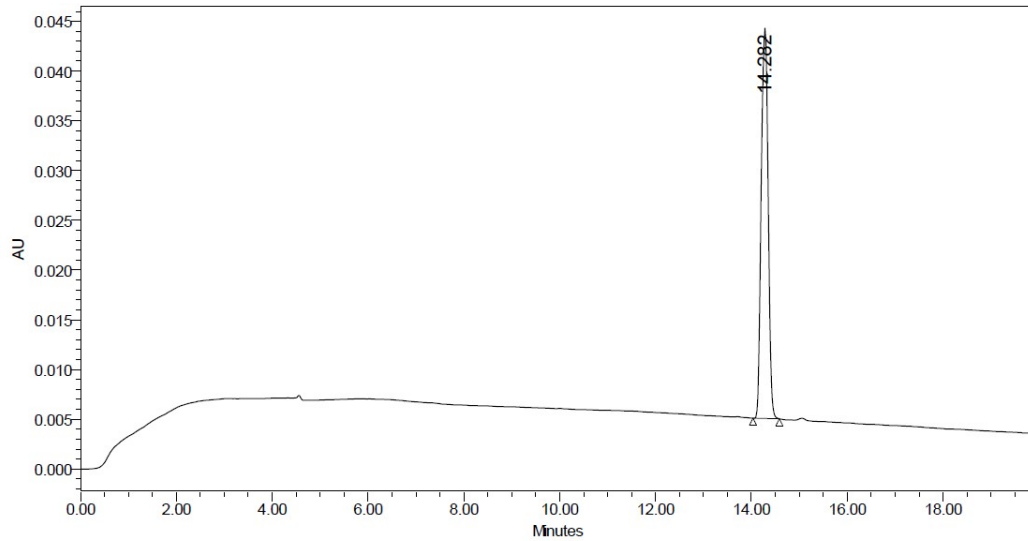

|   | RT<br>(min) | Area<br>( $\mu\text{V}^2\text{sec}$ ) | % Area | Height<br>( $\mu\text{V}$ ) | % Height |
|---|-------------|---------------------------------------|--------|-----------------------------|----------|
| 1 | 14.282      | 396028                                | 100.00 | 39195                       | 100.00   |

S 13. HPLC of 4-nitroaniline

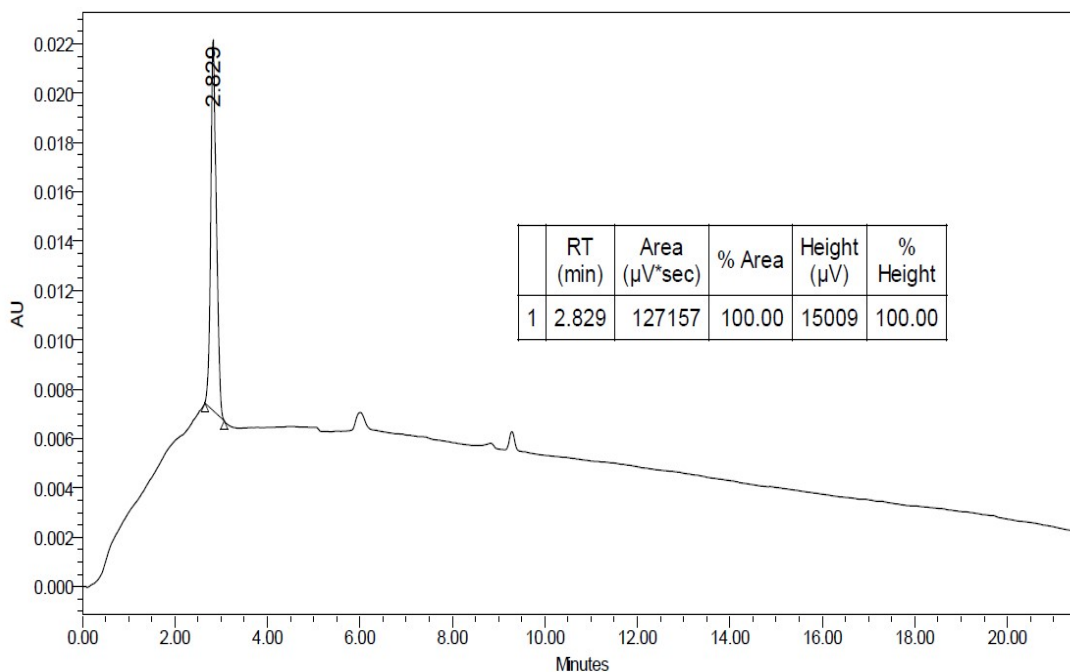

S 14. HPLC of reduction reaction of 4-nitroaniline to 4-aminoaniline

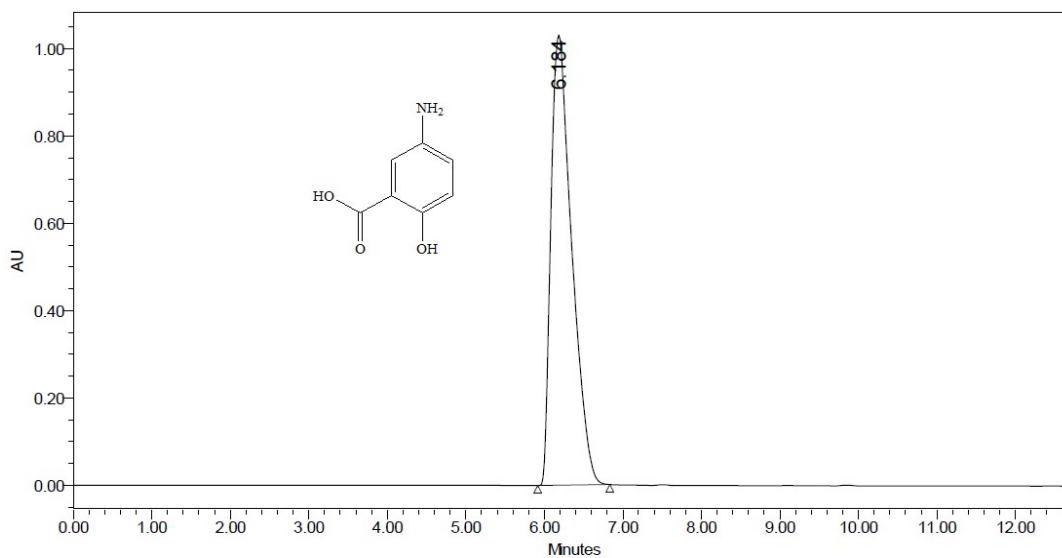

|   | RT (min) | Area ( $\mu\text{V}\cdot\text{sec}$ ) | % Area | Height ( $\mu\text{V}$ ) | % Height |
|---|----------|---------------------------------------|--------|--------------------------|----------|
| 1 | 6.184    | 19017345                              | 100.00 | 1030708                  | 100.00   |

S 15. HPLC of 5-amino-2-hydroxybenzoic acid (5-ASA)



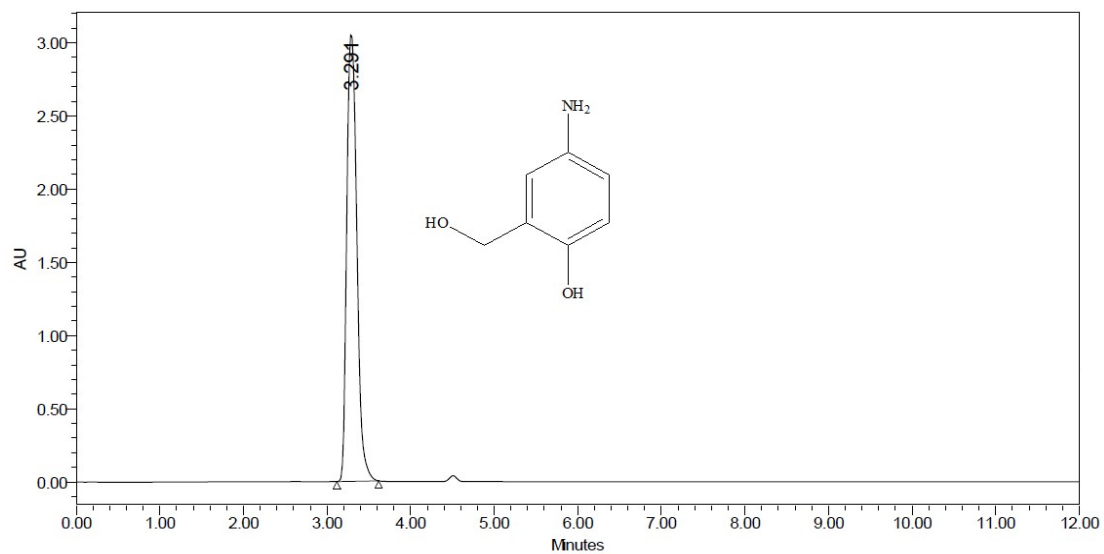

|   | RT<br>(min) | Area<br>( $\mu\text{V}\cdot\text{sec}$ ) | % Area | Height<br>( $\mu\text{V}$ ) | % Height |
|---|-------------|------------------------------------------|--------|-----------------------------|----------|
| 1 | 3.291       | 25529199                                 | 100.00 | 3082354                     | 100.00   |

S 16. Reduction of 5-amino-2-hydroxybenzoic acid to 4-amino-2-(hydroxymethyl)phenol

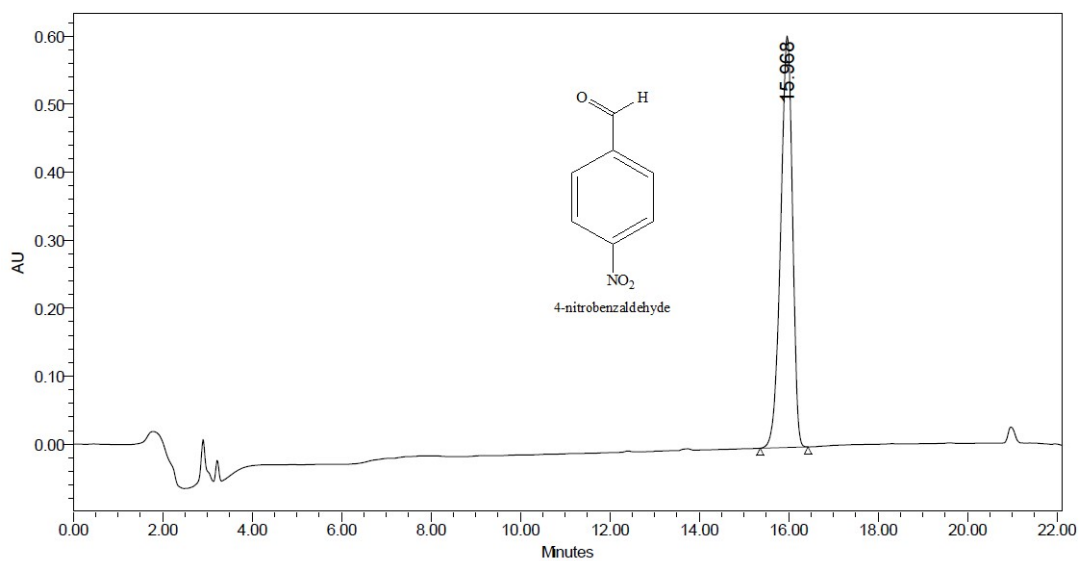

|   | RT (min) | Area ( $\mu\text{V}\cdot\text{sec}$ ) | % Area | Height ( $\mu\text{V}$ ) | % Height |
|---|----------|---------------------------------------|--------|--------------------------|----------|
| 1 | 15.968   | 11098183                              | 100.00 | 605203                   | 100.00   |

S 17. HPLC of 4-nitrobenzaldehyde (Standard)

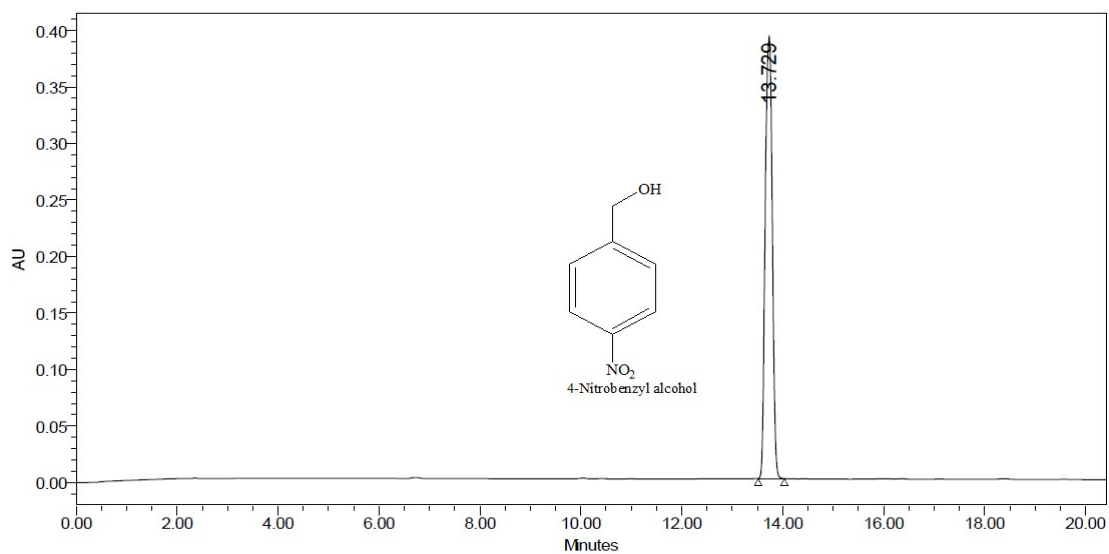

|   | RT (min) | Area ( $\mu\text{V}\cdot\text{sec}$ ) | % Area | Height ( $\mu\text{V}$ ) | % Height |
|---|----------|---------------------------------------|--------|--------------------------|----------|
| 1 | 13.729   | 3775886                               | 100.00 | 392580                   | 100.00   |

S 18. Reduction of 4-nitrobenzaldehyde to 4-Nitrobenzyl alcohol by  $\text{NaBH}_4$  without catalyst.

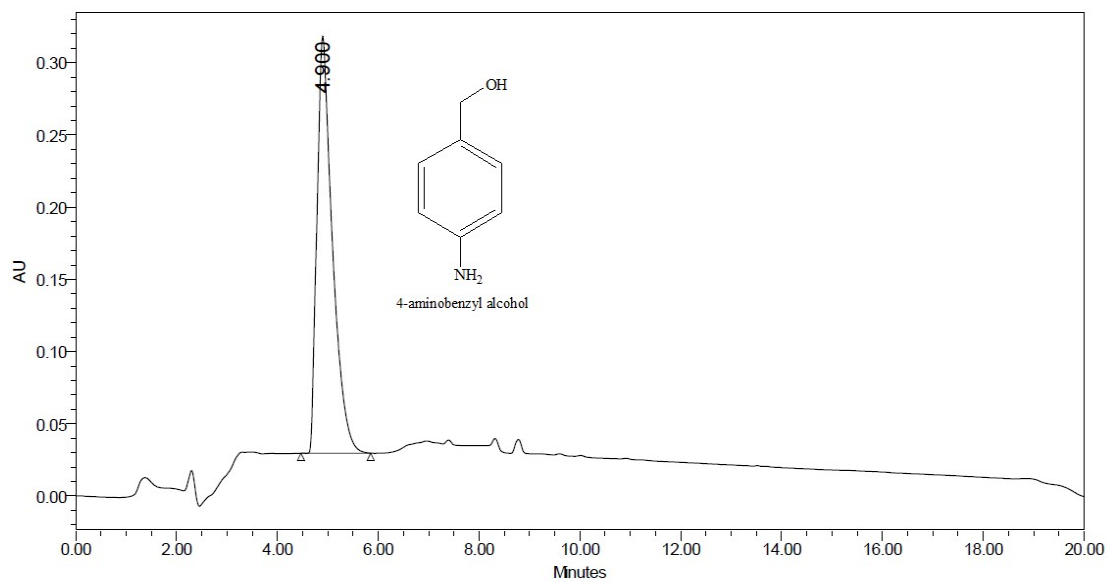

|   | RT<br>(min) | Area<br>( $\mu\text{V}\cdot\text{sec}$ ) | % Area | Height<br>( $\mu\text{V}$ ) | % Height |
|---|-------------|------------------------------------------|--------|-----------------------------|----------|
| 1 | 4.900       | 6166782                                  | 100.00 | 288771                      | 100.00   |

S 19. Reduction of 4-nitrobenzyl alcohol to 4-aminobenzyl alcohol by  $\text{NaBH}_4$  using catalyst

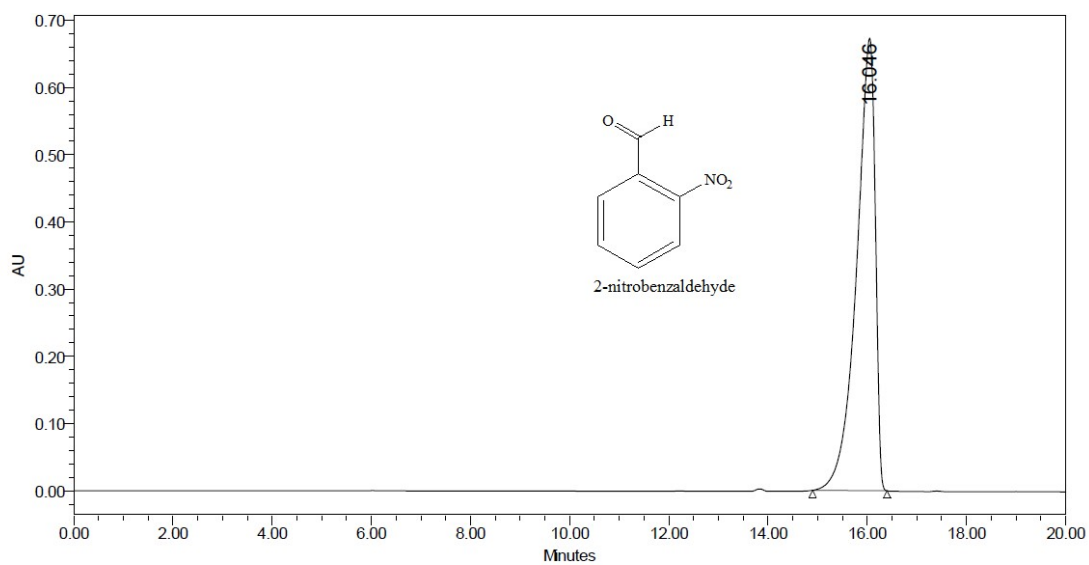

|   | RT<br>(min) | Area<br>( $\mu\text{V}\cdot\text{sec}$ ) | % Area | Height<br>( $\mu\text{V}$ ) | % Height |
|---|-------------|------------------------------------------|--------|-----------------------------|----------|
| 1 | 16.046      | 17528242                                 | 100.00 | 673526                      | 100.00   |

S 20. HPLC of 2-nitrobenzaldehyde (st)

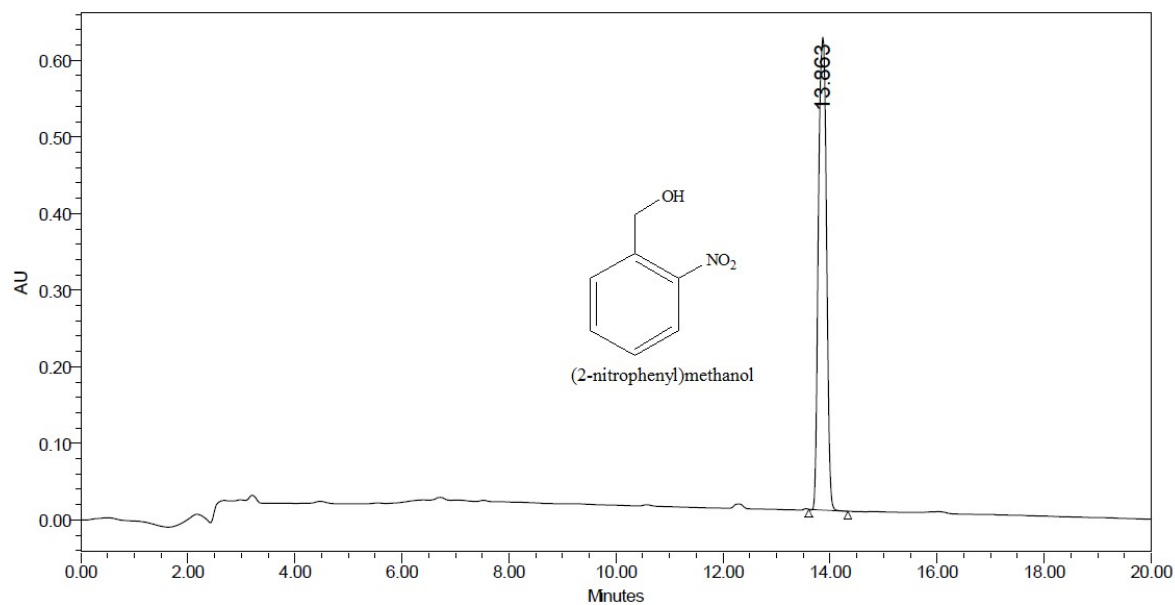

|   | RT (min) | Area ( $\mu\text{V}\cdot\text{sec}$ ) | % Area | Height ( $\mu\text{V}$ ) | % Height |
|---|----------|---------------------------------------|--------|--------------------------|----------|
| 1 | 13.863   | 6466791                               | 100.00 | 618050                   | 100.00   |

S 21. Reduction of 2-nitrobenzaldehyde to (2-nitrophenyl)methanol by  $\text{NaBH}_4$  without catalyst

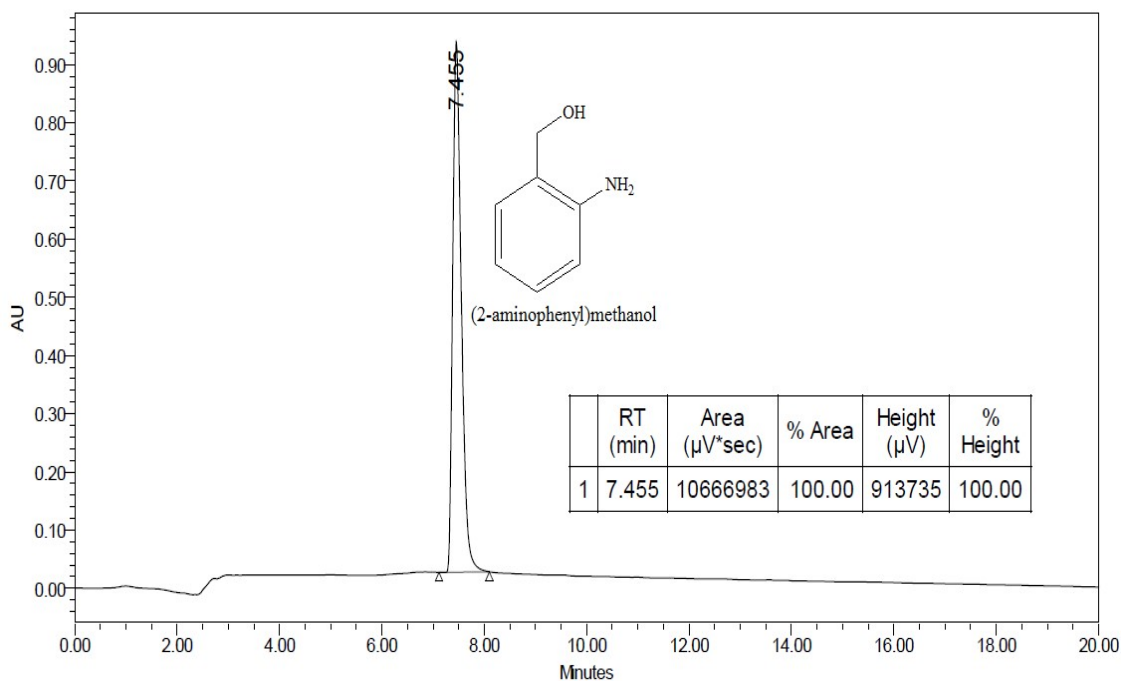

|   | RT (min) | Area ( $\mu\text{V}\cdot\text{sec}$ ) | % Area | Height ( $\mu\text{V}$ ) | % Height |
|---|----------|---------------------------------------|--------|--------------------------|----------|
| 1 | 7.455    | 10666983                              | 100.00 | 913735                   | 100.00   |

S 22. Reduction of (2-nitrophenyl)methanol to (2-aminophenyl)methanol by  $\text{NaBH}_4$  using catalyst
